# Supplementary material for: Substance Use in the Transgender Population: A Meta-Analysis
Source: MDPI journal article supplement (doi:10.3390/brainsci12030366), 2022-03-10
Supplement: s1 [file s1]

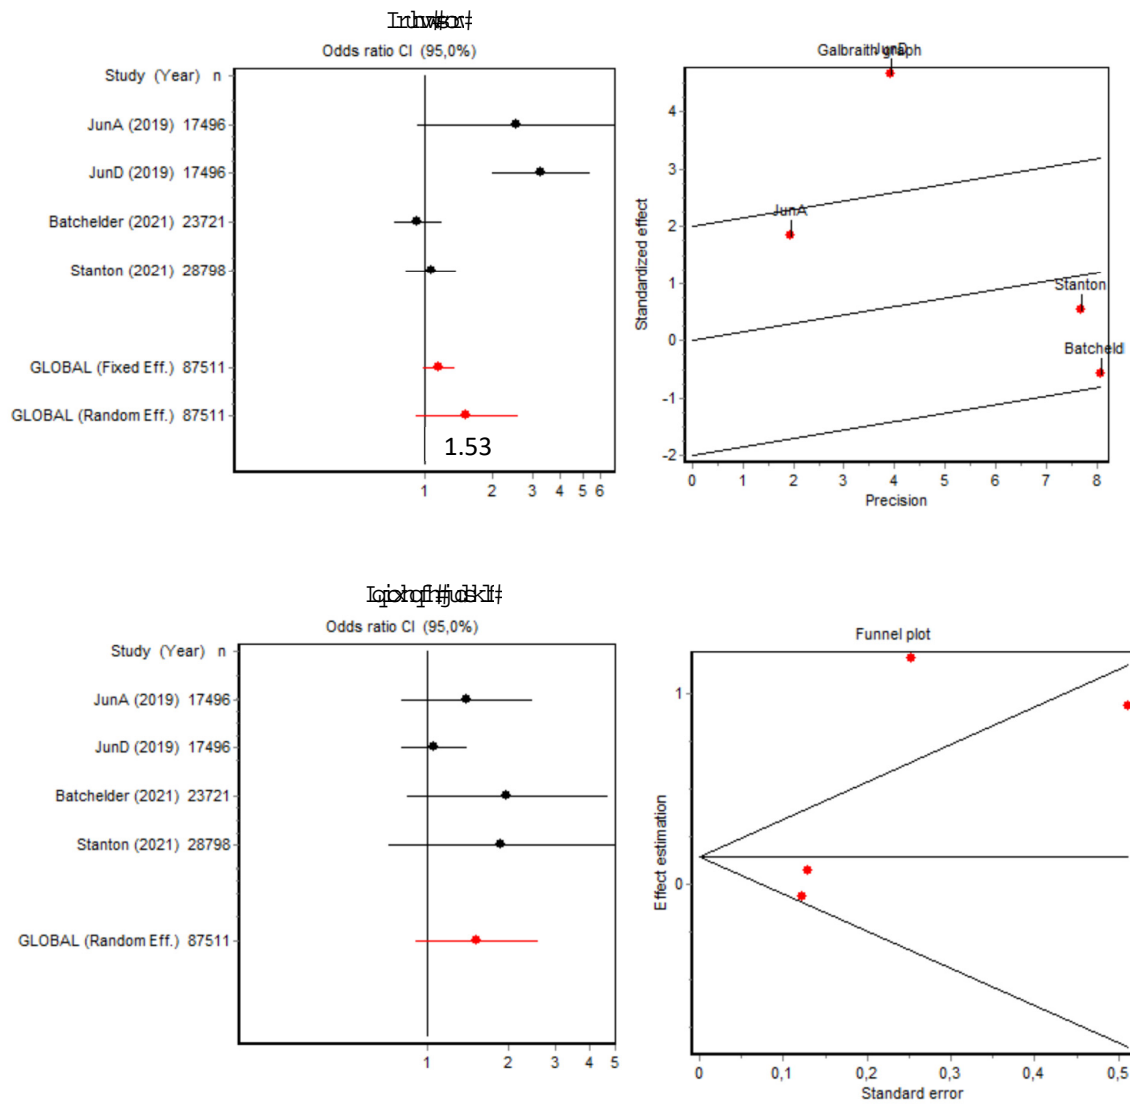

**Figure S3.** Forest plot, Galbraith graphic, influence graphic, and funnel plot for current substance use disorder. A: Abuse; D: Dependency.
